# Supplementary material
Source: publisher figshare collection journal article supplement (https://springernature.figshare.com/ndownloader/files/13837358)
Supplement: Supplementary file 1 [file 13837358]

**Additional file 1: Table S1.** Record of individual search terms for wheat (*Triticum aestivum*) in Web of Science Core Collection.Search conducted 2018-06-20.

| **Search term** | **Number of hitsa** |
| --- | --- |
| *Disease causing organism* |  |
| Fung* | 13 399 |
| Oomycete* | 83 |
| Nematod* | 1 049 |
| Bacter* | 8 207 |
| Virus* | 3 041 |
| Viral | 588 |
| Viroid* | 20 |
| Pathogen* | 8 504 |
| *Plant disease terms* |  |
| Disease incidence | 335 |
| Disease severity | 960 |
| Plant protection | 316 |
| Control strateg* | 312 |
| Risk management | 139 |
| Biological control | 1 845 |
| Disease control | 461 |
| IPM | 175 |
| Integrated Pest Management | 334 |
| Plant defen* | 800 |
| Resistance | 20 178 |
| Disease develop* | 395 |
| *Outcome* |  |
| Plant health | 130 |
| Yield | 43 600 |
| Qualit* | 24 520 |
| Harvest | 9 541 |
| Produc* | 61 563 |
| Pathogen reduction | 529 |
